# Supplementary material for: High-Resolution Mapping of Crossover and Non-crossover Recombination Events by Whole-Genome Re-sequencing of an Avian Pedigree
Source: PubMed Central journal article supplement (PMC4878770; doi:10.1371/journal.pgen.1006044), 2016-05-24

Supplementary Fig 1.

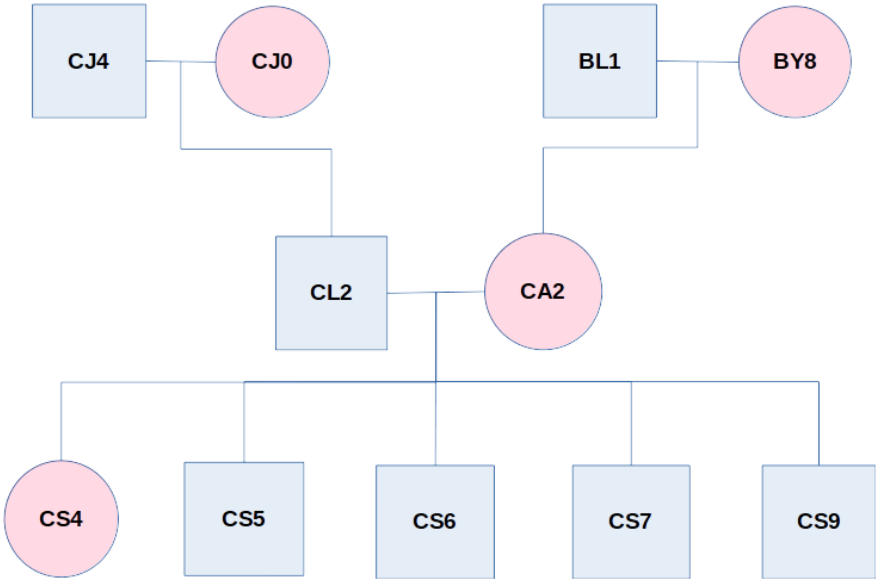

Supplement: pgen.1006044.s005.pdf [file pgen.1006044.s005.pdf]
